# Supplementary material for: Proteomic identification of the lactate dehydrogenase A in a radioresistant prostate cancer xenograft mouse model for improving radiotherapy
Source: PubMed Central journal article supplement (PMC5342052; doi:10.18632/oncotarget.12368), 2016-09-30
Supplement: oncotarget-07-74269-s001.pdf [file oncotarget-07-74269-s001.pdf]

## Proteomic identification of the lactate dehydrogenase A in a radioresistant prostate cancer xenograft mouse model for improving radiotherapy

### SUPPLEMENTARY FIGURE AND TABLES

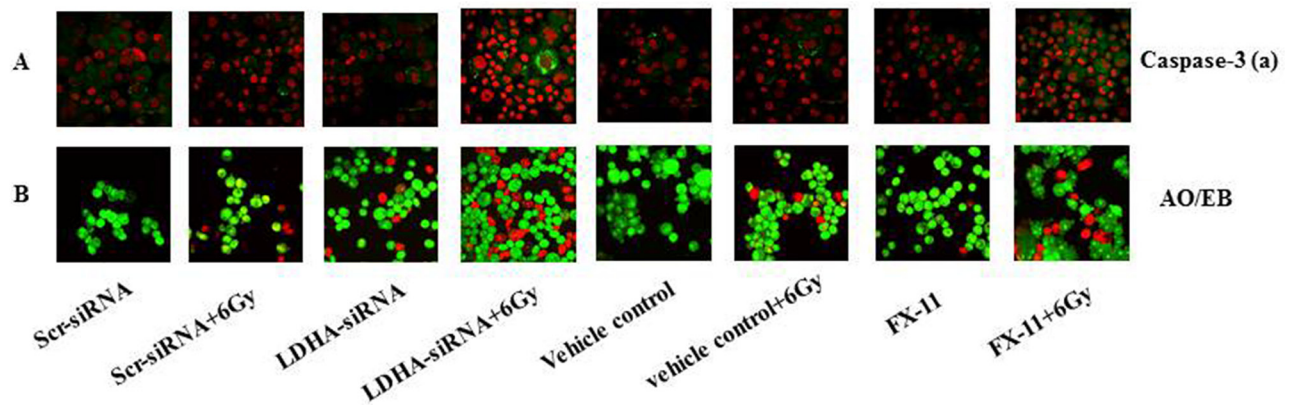

**Supplementary Figure S1: Confirmation of apoptosis after different treatments by fluorescence staining.** Expression of Caspase-3 (active) (apoptosis) and cell morphology were examined after different treatments by immunofluorescence staining. **A.** The staining intensity of Caspase-3 (active) was up-regulated in combination of LDHA KD or inhibitor and RT treated cells compared to single treatments or vehicle treatments. **B.** The apoptotic cells were also visualized by AO/EB staining. In Caspase-3 (active) study, green indicates viable cells while red indicates non-viable cells. In AO/EB experiment, condensed and fragmented nuclear chromatin characteristic of apoptosis is clearly seen in treated cells using acridine orange/ethidium bromide staining and confocal microscopy (red) while control-treated cells appeared normal (green). Magnification x 600 in all images.

**Supplementary Table S1: Intensity of expression of vasculature, hypoxia, EMT, CSC and glycolysis markers in PC3 and PC3-RR s.c. xenografts by IHC**

| Name of xenograft | IHC intensity |        |                |            |            |      |      |        |        |      |
|-------------------|---------------|--------|----------------|------------|------------|------|------|--------|--------|------|
|                   | CD31          | VEGFR2 | HIF-1 $\alpha$ | N-Cadherin | E-Cadherin | CD44 | Oct4 | GLUT-1 | PKM1/2 | LDHA |
| PC3               | 0~1           | 0~1    | 0~1            | 0~1        | 1~2        | 0~1  | 0~1  | 1~2    | 0~1    | 0~1  |
| PC3-RR            | 1~2           | 2~3    | 1~2            | 2~3        | 0~1        | 1~2  | 2~3  | 2~3    | 1~2    | 2~3  |

**Notes:** IHC staining scores: 0=negative; 1=weak; 2=moderate; 3=strong.

**Supplementary Table S2: Significantly differentially expressed proteins between PC-3 and PC-3RR xenografts.**

**See Supplementary File 1**

**Supplementary Table S3: Significant signaling pathways associated with CaP radioresistance identified by Ingenuity Pathways Analysis.**

**See Supplementary File 2**
